# Supplementary material
Source: PubMed Central journal article supplement (PMC11343043)
Supplement: ehp14339.s001.acco.pdf [file ehp14339.s001.acco.pdf]

**Note to readers with disabilities:** *EHP* strives to ensure that all journal content is accessible to all readers. However, some figures and Supplemental Material published in *EHP* articles may not conform to [508 standards](#) due to the complexity of the information being presented. If you need assistance accessing journal content, please contact [ehpsubmissions@niehs.nih.gov](mailto:ehpsubmissions@niehs.nih.gov). Our staff will work with you to assess and meet your accessibility needs within 3 working days.

### **Supplemental Material**

#### **Exposure of *Ldlr*<sup>-/-</sup> Mice to a PFAS Mixture and Outcomes Related to Circulating Lipids, Bile Acid Excretion, and the Intestinal Transporter ASBT**

Katherine Roth, Zhao Yang, Manisha Agarwal, Johnna Birbeck, Judy Westrick, Todd Lydic, Katherine Gurdziel, and Michael C. Petriello

#### **Table of Contents**

**Figure S1.** Fat weight in *Ldlr*<sup>-/-</sup> mice exposed to the PFAS mixture. Male and female *Ldlr*<sup>-/-</sup> mice were exposed to vehicle water or the PFAS mixture for 7 weeks. Fat weight was measured (n=10 mice per treatment group) via EchoMRI after 2, 4, and 7 weeks of PFAS exposure. Data given as a percentage of total body weight. Two-Way ANOVA was utilized to analyze both main effects (sex, PFAS) as well as the interaction between sex and PFAS (p<0.05). The Holm-Sidak post-hoc test was used for multiple comparisons. With past consultation from biostatisticians, a significant interaction term supersedes the main effects and can make their meaning unclear. We therefore have not included the main effects p-values for any result with a significant interaction. Box plots represent the median values with upper and lower quartiles; whiskers extend to the 1<sup>st</sup> and 99<sup>th</sup> percentiles. Bold p-values represent p<0.05; italicized p-values represent p<0.10. Data is reported in Excel Table S18.

**Figure S2.** Additional circulating cytokines in *Ldlr*<sup>-/-</sup> mice exposed to the PFAS mixture. Circulating cytokine protein levels for (A) IL-10, (B) IL-1 $\beta$ , (C) IFN- $\gamma$ , (D) IFN- $\alpha$ , and (E) IFN- $\beta$  were measured from plasma collected at euthanasia from mice of each treatment group (n=5). Two-Way ANOVA was utilized to analyze both main effects (sex, PFAS) as well as the interaction between sex and PFAS (p<0.05). The Holm-Sidak post-hoc test was used for multiple comparisons. Box plots represent the median values with upper and lower quartiles; whiskers extend to the 1<sup>st</sup> and 99<sup>th</sup> percentiles. Bold p-values represent p<0.05; italicized p-values represent p<0.10. Data is reported in Excel Table S19.

**Figure S3.** Additional hepatic bile acid transporters after exposure to the PFAS mixture. Total hepatic RNA from n=10 mice from each treatment group was isolated and expression levels of the transporters (A) *Abcc2*, (B) *Slc51β*, (C) *Slc10a2*, and (D) *Ephx1* were determined by RT-PCR. GAPDH was used as a housekeeping gene. Hepatic NTCP protein levels were analyzed via western blot for: female<sup>+</sup>vehicle (n=10), female<sup>+</sup>PFAS (n=10), male<sup>+</sup>vehicle (n=10), and male<sup>+</sup>PFAS (n=9). E) Western blot analysis of NTCP protein in the liver. F) Quantification of band intensity for NTCP protein relative to β-actin. Non-normally distributed data was Log10 transformed prior to statistical analysis. Two-Way ANOVA was utilized to analyze both main effects (sex, PFAS) as well as the interaction between sex and PFAS (p<0.05). The Holm-Sidak post-hoc test was used for multiple comparisons. With past consultation from biostatisticians, a significant interaction term supersedes the main effects and can make their meaning unclear. We therefore have not included the main effects p-values for any result with a significant interaction. Box plots represent the median values with upper and lower quartiles; whiskers extend to the 1<sup>st</sup> and 99<sup>th</sup> percentiles. Bold p-values represent p<0.05; italicized p-values represent p<0.10. Data reported in Excel Table S20 and S21.

**Figure S4.** Sex hormones in female mice after exposure to the PFAS mixture. Circulating hormone levels for (A) FSH, (B) progesterone, and (C) LH were measured from plasma collected at euthanasia from female control mice (n=8) and female PFAS-exposed mice (n=8). Statistical significance for FSH was determined by t-test (p<0.05). Statistical significance for progesterone and LH was determined by Mann-Whitney Rank Sum Test (p<0.05). Box plots represent the median values with upper and lower quartiles; whiskers extend to the 1<sup>st</sup> and 99<sup>th</sup> percentiles. Data reported in Excel Table S22.

**Table S1.** Clinton-Cybulsky Diet (Research Diets; New Brunswick, NJ, USA).

**Table S2.** Primer sequences used in RT-PCR.

**Table S3.** Correlations between circulating PFAS and cholesterol subfractions after exposure of *Ldlr*<sup>-/-</sup> mice to the PFAS mixture.

**Table S4.** Differentially expressed genes in the ileum after exposure of male *Ldlr*<sup>-/-</sup> mice to the PFAS mixture.

**Table S5.** Expression of genes related to the acute inflammatory response and lipid metabolism after exposure of male *Ldlr*<sup>-/-</sup> mice to the PFAS mixture.

**Table S6.** Modulation of hepatic nuclear receptor signaling after exposure of *Ldlr*<sup>-/-</sup> mice to the PFAS mixture.

**Additional File-** Excel Document

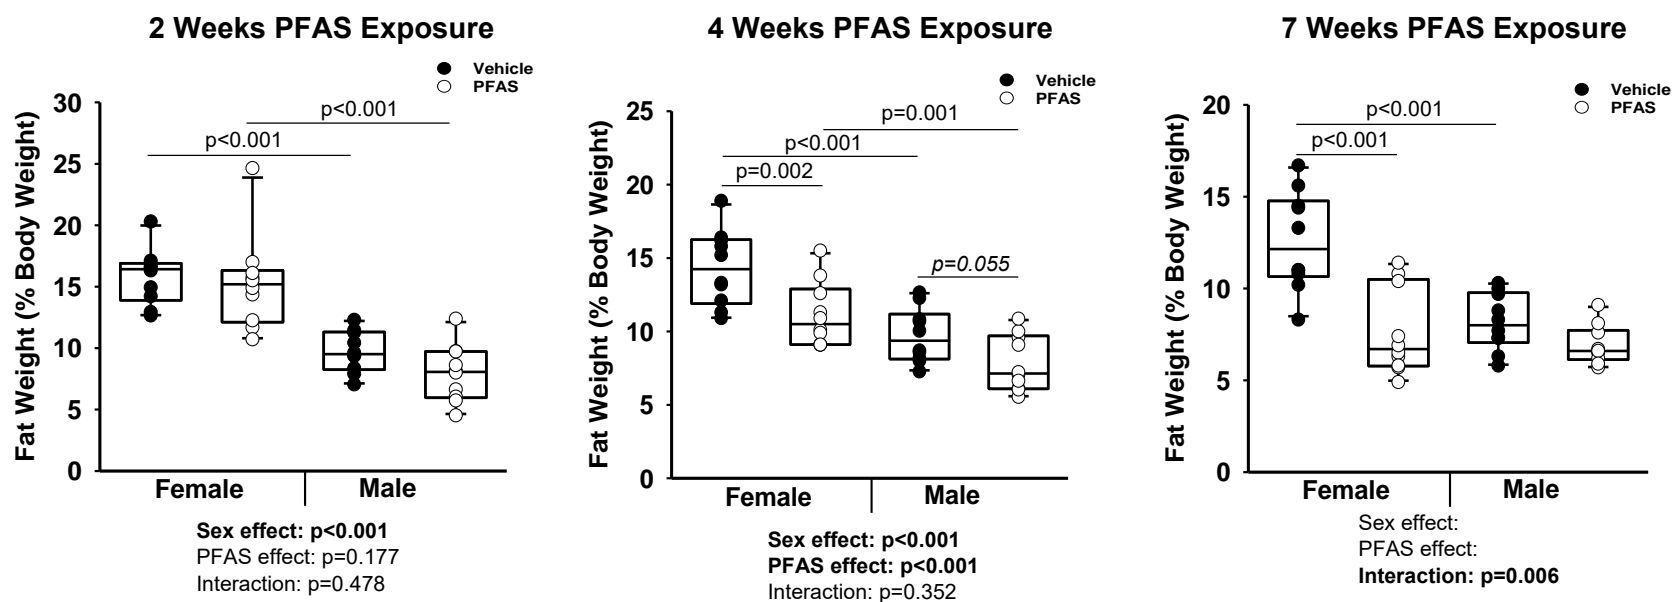

**Figure S1. Fat weight in *Ldlr*<sup>-/-</sup> mice exposed to the PFAS mixture.** Male and female *Ldlr*<sup>-/-</sup> mice were exposed to vehicle water or the PFAS mixture for 7 weeks. Fat weight was measured (n=10 mice per treatment group) via EchoMRI after 2, 4, and 7 weeks of PFAS exposure. Data given as a percentage of total body weight. Two-Way ANOVA was utilized to analyze both main effects (sex, PFAS) as well as the interaction between sex and PFAS (p<0.05). The Holm-Sidak post-hoc test was used for multiple comparisons. With past consultation from biostatisticians, a significant interaction term supersedes the main effects and can make their meaning unclear. We therefore have not included the main effects p-values for any result with a significant interaction. Box plots represent the median values with upper and lower quartiles; whiskers extend to the 1<sup>st</sup> and 99<sup>th</sup> percentiles. Bold p-values represent p<0.05; italicized p-values represent p<0.10. Data is reported in Excel Table S18.

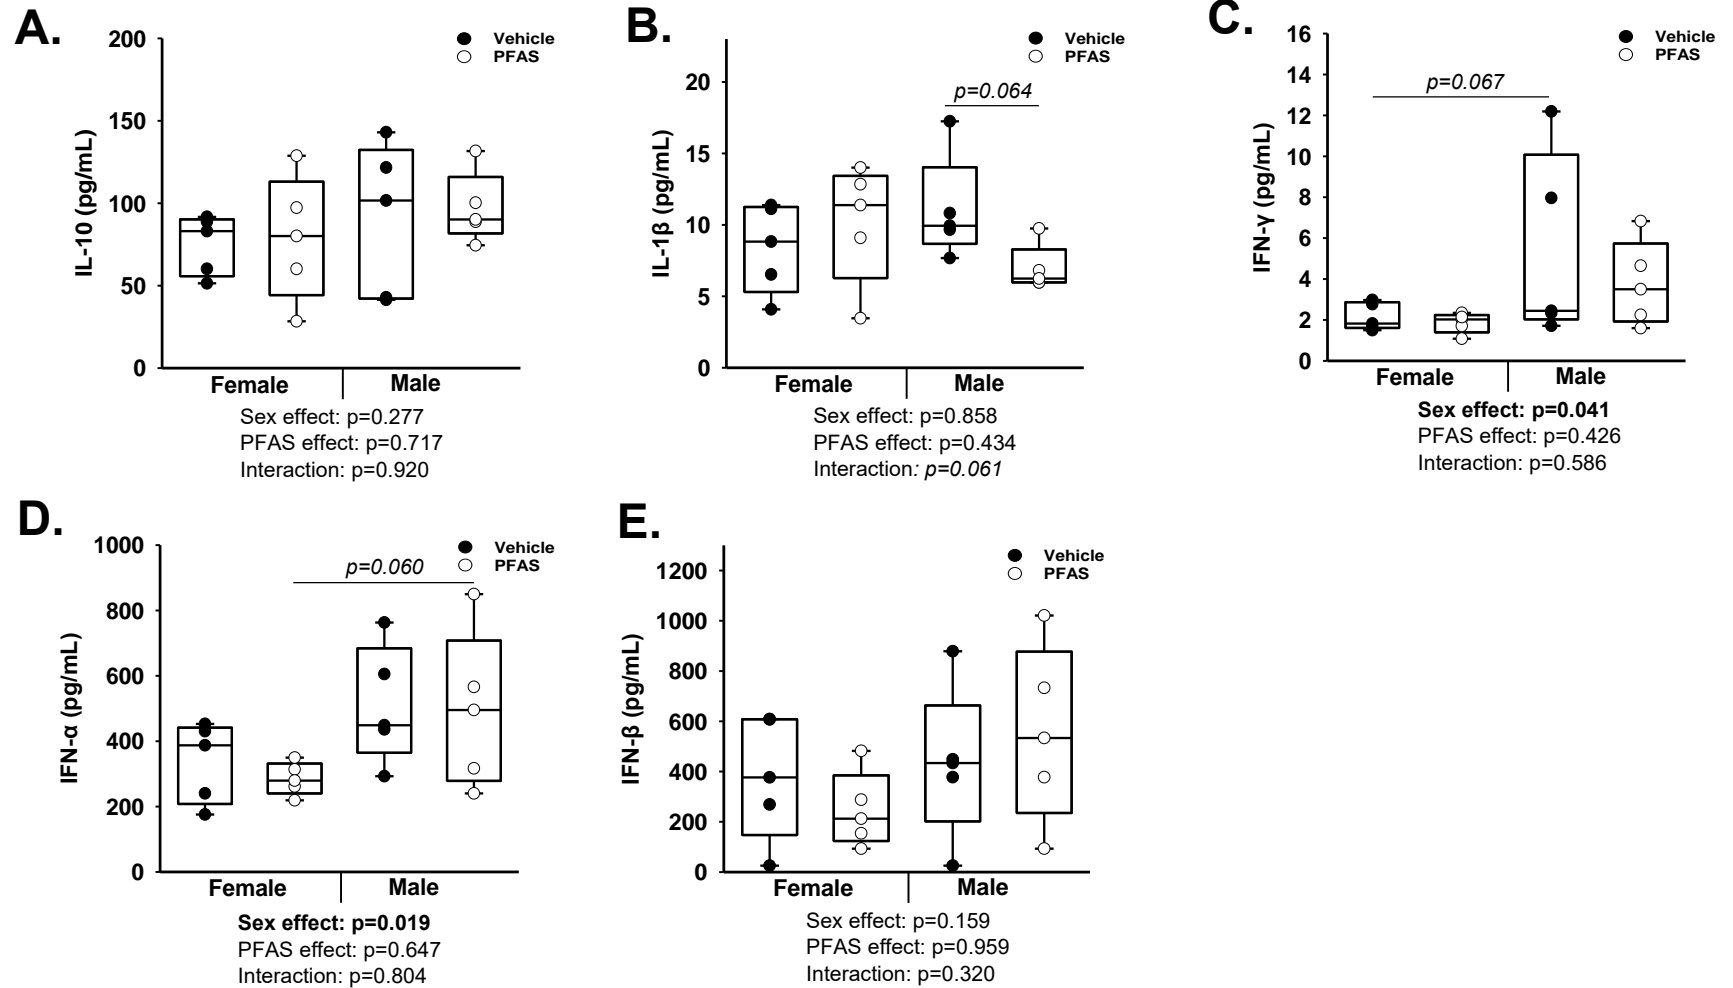

**Figure S2. Additional circulating cytokines in *Ldlr*<sup>-/-</sup> mice exposed to the PFAS mixture .** Circulating cytokine protein levels for (A) IL-10, (B) IL-1 $\beta$ , (C) IFN- $\gamma$ , (D) IFN- $\alpha$ , and (E) IFN- $\beta$  were measured from plasma collected at euthanasia from mice of each treatment group (n=5). Two-Way ANOVA was utilized to analyze both main effects (sex, PFAS) as well as the interaction between sex and PFAS ( $p<0.05$ ). The Holm-Sidak post-hoc test was used for multiple comparisons. Box plots represent the median values with upper and lower quartiles; whiskers extend to the 1<sup>st</sup> and 99<sup>th</sup> percentiles. Bold p-values represent  $p<0.05$ ; italicized p-values represent  $p<0.10$ . Data is reported in Excel Table S19.

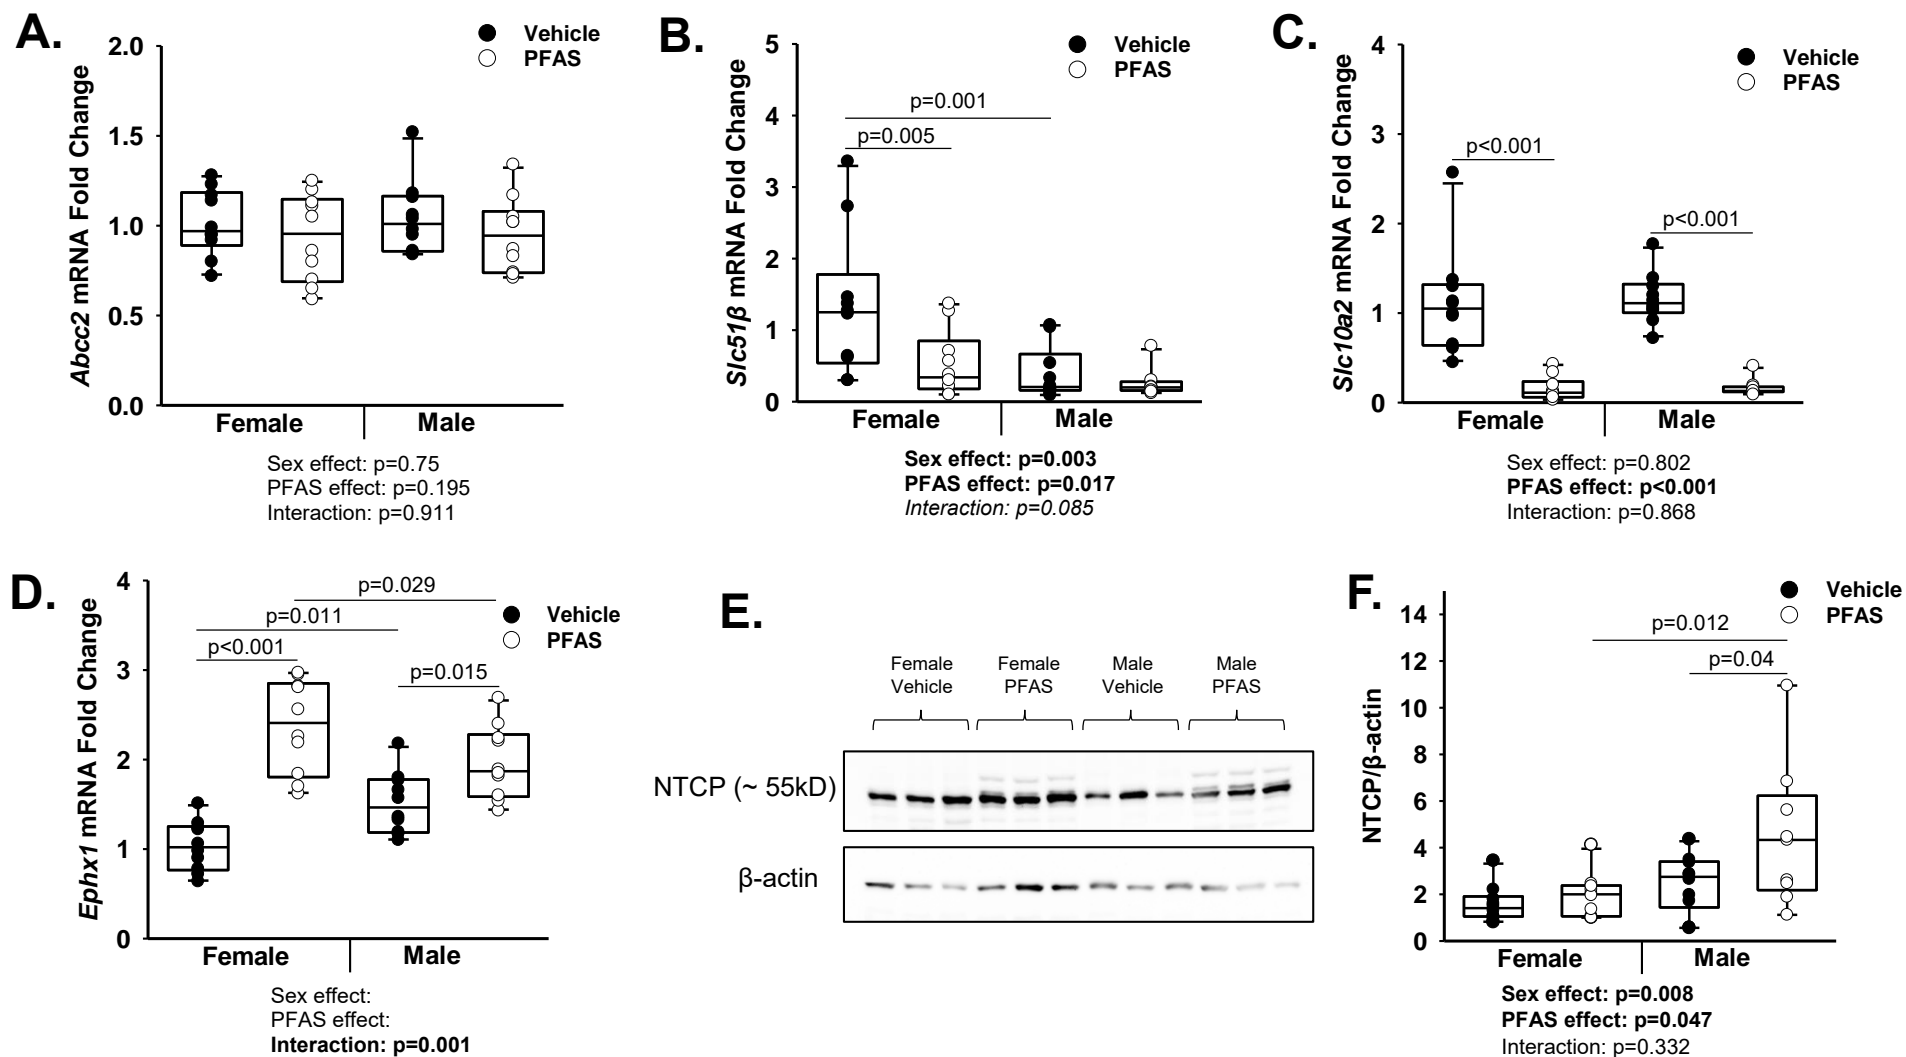

**Figure S3. Additional hepatic bile acid transporters after exposure to the PFAS mixture.** Total hepatic RNA from  $n=10$  mice from each treatment group was isolated and expression levels of the transporters (A) *Abcc2*, (B) *Slc51β*, (C) *Slc10a2*, and (D) *Ephx1* were determined by RT-PCR. GAPDH was used as a housekeeping gene. Hepatic NTCP protein levels were analyzed via western blot for: female+vehicle ( $n=10$ ), female+PFAS ( $n=10$ ), male+vehicle ( $n=10$ ), and male+PFAS ( $n=9$ ). E) Western blot analysis of NTCP protein in the liver. F) Quantification of band intensity for NTCP protein relative to  $\beta$ -actin. Non-normally distributed data was Log10 transformed prior to statistical analysis. Two-Way ANOVA was utilized to analyze both main effects (sex, PFAS) as well as the interaction between sex and PFAS ( $p<0.05$ ). The Holm-Sidak post-hoc test was used for multiple comparisons. With past consultation from biostatisticians, a significant interaction term supersedes the main effects and can make their meaning unclear. We therefore have not included the main effects p-values for any result with a significant interaction. Box plots represent the median values with upper and lower quartiles; whiskers extend to the 1<sup>st</sup> and 99<sup>th</sup> percentiles. Bold p-values represent  $p<0.05$ ; italicized p-values represent  $p<0.10$ . Data reported in Excel Table S20 and S21.

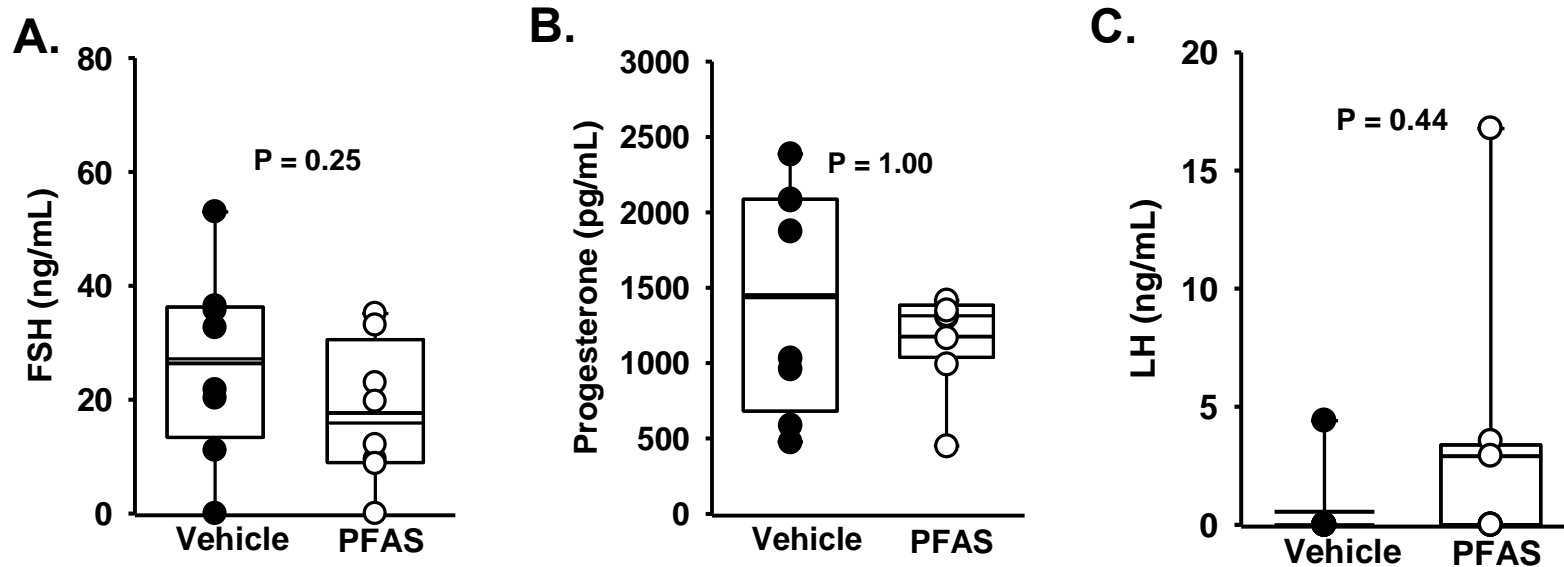

**Figure S4. Sex hormones in female mice after exposure to the PFAS mixture.** Circulating hormone levels for (A) FSH, (B) progesterone, and (C) LH were measured from plasma collected at euthanasia from female control mice (n=8) and female PFAS-exposed mice (n=8). Statistical significance for FSH was determined by t-test ( $p < 0.05$ ). Statistical significance for progesterone and LH was determined by Mann-Whitney Rank Sum Test ( $p < 0.05$ ). Box plots represent the median values with upper and lower quartiles; whiskers extend to the 1<sup>st</sup> and 99<sup>th</sup> percentiles. Data reported in Excel Table S22.

**Table S1: Clinton-Cybulsky Diet (Research Diets; New Brunswick, NJ, USA)**

| <b>Product #</b>    | <b>D01061401C</b> |             |
|---------------------|-------------------|-------------|
| <b>%</b>            | <b>gm</b>         | <b>kcal</b> |
| Protein             | 19.2              | 20.0        |
| Carbohydrate        | 67.2              | 70.0        |
| Fat                 | 4.3               | 10.0        |
| Total               |                   | 100.0       |
| Kcal/gm             | 3.84              |             |
|                     |                   |             |
| <b>Ingredient</b>   | <b>gm</b>         | <b>kcal</b> |
| Casein, Lactic      | 200               | 800         |
| L-Cystine           | 3                 | 12          |
|                     |                   |             |
| Corn Starch         | 375               | 1500        |
| Maltodextrin 10     | 125               | 500         |
| Sucrose             | 200               | 800         |
|                     |                   |             |
| Cellulose, BW200    | 50                | 0           |
|                     |                   |             |
| Soybean Oil         | 25                | 225         |
| Cocoa Butter        | 20                | 180         |
|                     |                   |             |
| Mineral Mix S10021  | 10                | 0           |
| Dicalcium Phosphate | 13                | 0           |
| Calcium Carbonate   | 5.5               | 0           |
| Potassium Citrate   | 16.5              | 0           |
|                     |                   |             |
| Vitamin Mix V10001  | 10                | 40          |
| Choline Bitartrate  | 2                 | 0           |
|                     |                   |             |
| Cholesterol         | 1.6               | 0           |
|                     |                   |             |
| Red Dye, FD&C #40   | 0                 | 0           |
| Blue Dye, FD&C #1   | 0                 | 0           |
| Yellow Dye, FD&C #5 | 0                 | 0           |
|                     |                   |             |
| <b>Total</b>        | <b>1056.60</b>    | <b>4057</b> |

**Table S2. Primer sequences used in RT-PCR.**

| <b>SYBR Green Primers</b>            |                                        |                                        |
|--------------------------------------|----------------------------------------|----------------------------------------|
| <b>Target Gene</b>                   | <b>Forward Primer Sequence (5'-3')</b> | <b>Reverse Primer Sequence (5'-3')</b> |
| <i>Hmgcr</i>                         | GCAGCTTGGGTCCAAGTACA                   | CAAGGCATTCCACAAGAGCG                   |
| <i>Abcc2</i>                         | GCAACTCTACTTTTTGGAATCTCT               | CCAAGAGCCAAAGAAAGCCC                   |
| <i>Abcc3</i>                         | GGACTCTCATGTGGCGAAGC                   | TTACCAGCACCCGAGTCTTGC                  |
| <i>Abcc4</i>                         | ACACCGAGGTGAAACCCAACC                  | GCGGGTTGAGCCACCAGAA                    |
| <i>Slc10a1</i>                       | GGACATGAACCTCAGCATTGTG                 | GCCTTTGTAGGGCACCTTGT                   |
| <i>Slc10a2</i>                       | TGGGTTTCTTCTGGCTAGACT                  | TGTTCTGCATTCCAGTTTCCAA                 |
| <i>Abcb11</i>                        | TTCGAATCAGATGGTTTCCATAAC               | GCGCACACACTTCCATAAA                    |
| <i>Ephx1</i>                         | GGGTCAAAGCCATCAGCCA                    | CCTCCAGAAGGACACCACTTT                  |
| <i>Slc51b</i>                        | CAGGAACTGCTGGAAGAAATGC                 | GCAGGTCTTCTGGTGTTCCTTGT                |
| <i>Nr1h4</i>                         | TGTGAGGGCTGCAAAGGTTT                   | ACATCCCCATCTCTCTGCAC                   |
| <i>mFgf15</i>                        | TCGCTACTCGGAGGAAGACTGTAC               | TCTGGTCCTGGAGCTGTTCTCTG                |
| <i>Nr0b2</i>                         | AAGGGCACGATCCTCTTCAA                   | CTGTTGCAGGTGTGCGATGT                   |
| <i>Nr1i2</i>                         | GATGGAGGTCTTCAAATCTGCC                 | CAGCCGGACATTGCGTTTC                    |
| <i>Cyp3a11</i>                       | CTGGAGGTGATGTTGAGTGTT                  | TGCTAGCCTAAGCATTGGAC                   |
| <i>Nr1i3</i>                         | GATCAGCTACAAGAGGAGATGG                 | TTGCATACAGAAACCGACTTTG                 |
| <i>Cyp2b10</i>                       | TTTCTGCCCTTCTCAACAGGAA                 | TGGACGTGAAGAAAAGGAACAAC                |
| <i>Keap1</i>                         | AGCGTGGAGAGAGATATGAGCC                 | ATCATCCGCCACTCATTCT                    |
| <i>Gstm1</i>                         | ATACTGGGATACTGGAACGTCC                 | AGTCAGGGTTGTAACAGAGCAT                 |
| <i>Ppara</i>                         | GAGGCAGCCGCTTACG                       | GCCACAAACGTCAGTTCACAG                  |
| <i>Ppar<math>\delta/\beta</math></i> | GCCACAACGCACCCTTTG                     | CCACACCAGGCCCTTCTCT                    |
| <i>Gapdh</i>                         | CAAGGAGTAAGAAACCCTGGACC                | CGAGTTGGGATAGGGCCTCT                   |
| <b>TaqMan Probes</b>                 |                                        |                                        |
| <b>Target Gene</b>                   | <b>TaqMan Probe</b>                    |                                        |
| <i>Cyp7a1</i>                        | Mm00484152_m1                          |                                        |
| <i>Cyp27a1</i>                       | Mm00470430_m1                          |                                        |
| <i>Gapdh</i>                         | Mm99999915_g1                          |                                        |



**Table S3. Correlations between circulating PFAS and cholesterol subfractions after exposure of *Ldlr<sup>-/-</sup>* mice to the PFAS mixture**

| PFAS <sup>a</sup> | Spearman Correlation Coefficient | P value <sup>b</sup> | Spearman Correlation Coefficient | P value <sup>b</sup> | Spearman Correlation Coefficient  | P value <sup>b</sup> | Spearman Correlation Coefficient | P value <sup>b</sup> |
|-------------------|----------------------------------|----------------------|----------------------------------|----------------------|-----------------------------------|----------------------|----------------------------------|----------------------|
|                   | Total VLDL & LDL Cholesterol     |                      | Free VLDL & LDL Cholesterol      |                      | Esterified VLDL & LDL Cholesterol |                      | Total HDL                        |                      |
| PFOS              | 0.515                            | p=0.128              | *0.685                           | *p=0.029             | 0.552                             | p=0.098              | *-0.636                          | *p=0.048             |
| PFOA              | 0.600                            | 0.067                | 0.624                            | 0.054                | *0.649                            | *0.043               | -0.624                           | 0.054                |
| PFHxS             | 0.321                            | 0.366                | 0.249                            | 0.489                | 0.406                             | 0.244                | -0.321                           | 0.366                |
| PFNA              | 0.455                            | 0.187                | 0.467                            | 0.174                | 0.527                             | 0.117                | -0.418                           | 0.229                |
| HFPO-DA           | -0.1636                          | 0.652                | -0.261                           | 0.467                | -0.079                            | 0.829                | 0.091                            | 0.803                |

PFOS= Perfluorooctanesulfonic acid; PFOA= Perfluorooctanoic acid; PFHxS= Perfluorohexane sulfonic acid. PFNA= Perfluorononanoic acid; HFPO-DA (GenX)= Hexafluoropropylene oxide dimer acid.

\* represents statistical significance (p<0.05); italicized p-values represent p< 0.10.

<sup>a</sup>n=10 total; data from 5 PFAS exposed females and 5 PFAS exposed males were used.

<sup>b</sup> Spearman correlations between PFAS and cholesterol variables were determined using JMP 15 software.

**Table S4. Differentially expressed genes in the ileum after exposure of male *Ldlr*<sup>-/-</sup> mice to the PFAS mixture.**

| Gene Name <sup>a</sup> | Overall PFAS Exposure Log2Fold Change <sup>b</sup> | Overall PFAS Exposure FDR-adjusted q-value |
|------------------------|----------------------------------------------------|--------------------------------------------|
| <i>Marco</i>           | 5.33                                               | q=0.018                                    |
| <i>Gm16596</i>         | 4.36                                               | q=0.006                                    |
| <i>5930412G12Rik</i>   | 4.29                                               | q=0.026                                    |
| <i>Igfals</i>          | 3.90                                               | q=0.012                                    |
| <i>Rnase2b</i>         | 3.59                                               | q=0.046                                    |
| <i>Cpn2</i>            | 3.37                                               | q=0.007                                    |
| <i>Tmem255a</i>        | 2.41                                               | q=0.011                                    |
| <i>Gm39556</i>         | 2.33                                               | q=0.019                                    |
| <i>Bmpr1b</i>          | 2.33                                               | q=0.046                                    |
| <i>Gm5415</i>          | 2.26                                               | q=0.008                                    |
| <i>Gm34828</i>         | 2.15                                               | q=0.011                                    |
| <i>Macc1</i>           | 2.15                                               | q=0.040                                    |
| <i>Cyp3a44</i>         | 2.02                                               | q<0.001                                    |
| <i>Prss27</i>          | 1.82                                               | q<0.001                                    |
| <i>Sprr2b</i>          | 1.75                                               | q=0.015                                    |
| <i>Tlr7</i>            | 1.72                                               | q=0.028                                    |
| <i>Steap1</i>          | 1.63                                               | q=0.006                                    |
| <i>Ifft3b</i>          | 1.61                                               | q=0.050                                    |
| <i>Saa1</i>            | 1.52                                               | q=0.001                                    |
| <i>Reg3g</i>           | 1.40                                               | q<0.001                                    |
| <i>Gm15658</i>         | 1.39                                               | q=0.008                                    |
| <i>Pla2g5</i>          | 1.38                                               | q=0.008                                    |
| <i>Thpo</i>            | 1.37                                               | q<0.001                                    |
| <i>B3galt5</i>         | 1.34                                               | q=0.008                                    |
| <i>Acta1</i>           | 1.32                                               | q=0.007                                    |
| <i>Adora1</i>          | 1.31                                               | q=0.006                                    |
| <i>Nfkbie</i>          | 1.24                                               | q=0.046                                    |
| <i>Reg3b</i>           | 1.23                                               | q<0.001                                    |
| <i>Socs3</i>           | 1.16                                               | q<0.001                                    |
| <i>Alpk1</i>           | 1.13                                               | q=0.004                                    |
| <i>Tifa</i>            | 1.13                                               | q<0.001                                    |
| <i>Pfkfb3</i>          | 1.11                                               | q<0.001                                    |
| <i>Duoxa2</i>          | 1.07                                               | q=0.025                                    |
| <i>Duox2</i>           | 1.06                                               | q=0.004                                    |
| <i>Tctex1d2</i>        | 1.05                                               | q=0.041                                    |
| <i>Scd2</i>            | 1.04                                               | q<0.001                                    |
| <i>Npr3</i>            | -1.01                                              | q=0.013                                    |
| <i>Ehhadh</i>          | -1.01                                              | q=0.007                                    |
| <i>Gm40078</i>         | -1.04                                              | q=0.011                                    |
| <i>Snord89</i>         | -1.07                                              | q=0.027                                    |
| <i>G6pc</i>            | -1.14                                              | q<0.001                                    |
| <i>Retsat</i>          | -1.15                                              | q<0.001                                    |
| <i>Hist1h1b</i>        | -1.16                                              | q=0.002                                    |

|                      |       |         |
|----------------------|-------|---------|
| <i>Edn1</i>          | -1.16 | q=0.013 |
| <i>Arg2</i>          | -1.17 | q=0.038 |
| <i>Tcf23</i>         | -1.19 | q=0.002 |
| <i>Rn7sk</i>         | -1.24 | q=0.014 |
| <i>Acot2</i>         | -1.31 | q<0.001 |
| <i>Gm35166</i>       | -1.33 | q=0.026 |
| <i>Grin3b</i>        | -1.36 | q=0.005 |
| <i>LOC108168346</i>  | -1.37 | q=0.022 |
| <i>Gm30810</i>       | -1.53 | q=0.011 |
| <i>Gstm3</i>         | -1.56 | q<0.001 |
| <i>Ccdc168</i>       | -1.57 | q=0.015 |
| <i>LOC102636299</i>  | -1.68 | q=0.028 |
| <i>Dct</i>           | -1.75 | q=0.025 |
| <i>Acot1</i>         | -1.87 | q<0.001 |
| <i>Snora75</i>       | -2.07 | q=0.023 |
| <i>Hmgcs2</i>        | -2.08 | q<0.001 |
| <i>Ugt1a1</i>        | -2.15 | q<0.001 |
| <i>4930415O20Rik</i> | -2.33 | q=0.044 |
| <i>Col17a1</i>       | -2.35 | q=0.032 |
| <i>Gjb5</i>          | -2.53 | q=0.037 |
| <i>Gm38851</i>       | -2.61 | q=0.029 |
| <i>Gm30757</i>       | -2.68 | q=0.021 |
| <i>LOC108168164</i>  | -2.72 | q=0.003 |
| <i>Cyp4a10</i>       | -2.76 | q=0.006 |
| <i>Uprt</i>          | -2.83 | q=0.009 |
| <i>Neurod2</i>       | -4.39 | q=0.031 |
| <i>Zpbp2</i>         | -4.62 | q=0.003 |

<sup>a</sup> n=20 total; n=10 male vehicle, n=10 male PFAS

<sup>b</sup> Data presented as log<sub>2</sub> fold change based on RNA-sequencing. The genes included are based on |log<sub>2</sub> fold change| ≥ 1; q-value < 0.05)

Statistical significance was determined by t-test using the R statistical software package.

**Table S5: Expression of genes related to the acute inflammatory response and lipid metabolism after exposure of male *Ldlr*<sup>-/-</sup> mice to the PFAS mixture.**

| Gene Name                                                 | Male Vehicle<br>(Average ± SEM)<br>RNA-seq Counts | Male PFAS<br>(Average ± SEM)<br>RNA-seq Counts | Overall PFAS<br>Exposure Fold<br>Change | Overall PFAS<br>Exposure<br>p-value | Overall PFAS<br>Exposure FDR-<br>adjusted q-value |
|-----------------------------------------------------------|---------------------------------------------------|------------------------------------------------|-----------------------------------------|-------------------------------------|---------------------------------------------------|
| <b>GO:0002526~acute inflammatory response<sup>a</sup></b> |                                                   |                                                |                                         |                                     |                                                   |
| <i>C2cd4b</i>                                             | 5.3 ± 1.3                                         | 10.8 ± 1.8                                     | 2.21                                    | p=0.013                             | q=0.276                                           |
| <i>Mylk3</i>                                              | 34.7 ± 5.0                                        | 16 ± 5.4                                       | 0.45                                    | p=0.003                             | q=0.119                                           |
| <i>Oprm1</i>                                              | 1.5 ± 0.6                                         | 0.1 ± 0.1                                      | 0.15                                    | p=0.009                             | q=0.231                                           |
| <i>Tnf</i>                                                | 2 ± 0.7                                           | 6 ± 1.2                                        | 3.17                                    | p=0.005                             | q=0.153                                           |
| <i>F3</i>                                                 | 10.8 ± 2.5                                        | 22.5 ± 6.6                                     | 2.04                                    | p=0.034                             | q=0.447                                           |
| <i>F8</i>                                                 | 6.5 ± 1.1                                         | 14.1 ± 3.9                                     | 2.30                                    | p=0.005                             | q=0.153                                           |
| <i>Reg3g</i>                                              | 16160.6 ± 1617.1                                  | 40838.5 ± 5913.6                               | 2.64 *                                  | p<0.001                             | *q<0.001                                          |
| <i>Defb1</i>                                              | 12.6 ± 2.7                                        | 5.2 ± 1.4                                      | 0.41                                    | p=0.007                             | q=0.193                                           |
| <i>Il31ra</i>                                             | 0.3 ± 0.2                                         | 2.7 ± 1.1                                      | 6.12                                    | p=0.020                             | q=0.344                                           |
| <i>Saa1</i>                                               | 0.6 ± 0.3                                         | 3 ± 1.1                                        | 2.87 *                                  | p<0.001                             | *q=0.001                                          |
| <i>Adora1</i>                                             | 15.8 ± 2.7                                        | 38.6 ± 6.5                                     | 2.47 *                                  | p<0.001                             | *q=0.006                                          |
| <i>Saa2</i>                                               | 724.5 ± 119.1                                     | 2002.3 ± 399.2                                 | 4.34                                    | p=0.011                             | q=0.246                                           |
| <i>Reg3b</i>                                              | 39598.6 ± 3754.0                                  | 88972 ± 9567.8                                 | 2.34 *                                  | p<0.001                             | *q<0.001                                          |
| <i>Ugt1a1</i>                                             | 18.8 ± 2.7                                        | 4 ± 0.9                                        | 0.23 *                                  | p<0.001                             | *q<0.001                                          |
| <i>Masp1</i>                                              | 5.7 ± 1.4                                         | 11 ± 3.2                                       | 2.15                                    | p=0.031                             | q=0.431                                           |
| <i>Cd5l</i>                                               | 1.6 ± 0.7                                         | 7.7 ± 6.0                                      | 5.28                                    | p=0.016                             | q=0.301                                           |
| <b>GO:0006629~lipid metabolic process<sup>a</sup></b>     |                                                   |                                                |                                         |                                     |                                                   |
| <i>Cyp11b1</i>                                            | 1.1 ± 0.6                                         | 0 ± 0                                          | 0.12                                    | p=0.025                             | q=0.390                                           |
| <i>4833423E24Rik</i>                                      | 0.7 ± 0.4                                         | 0 ± 0                                          | 0.14                                    | p=0.044                             | q=0.507                                           |
| <i>Fabp1</i>                                              | 1116.1 ± 300.1                                    | 397.4 ± 77.7                                   | 0.39                                    | p=0.001                             | q=0.062                                           |
| <i>Enpp6</i>                                              | 2.8 ± 0.5                                         | 6.3 ± 1.6                                      | 2.30                                    | p=0.030                             | q=0.419                                           |
| <i>Acss3</i>                                              | 2.4 ± 0.7                                         | 0.4 ± 0.2                                      | 0.23                                    | p=0.017                             | q=0.312                                           |
| <i>Pla2g5</i>                                             | 10.4 ± 1.1                                        | 26.4 ± 6.4                                     | 2.59 *                                  | p<0.001                             | *q=0.008                                          |
| <i>Plppr5</i>                                             | 6.2 ± 1.6                                         | 1.8 ± 0.7                                      | 0.31                                    | p=0.007                             | q=0.202                                           |
| <i>Cyp2d12</i>                                            | 0.4 ± 0.2                                         | 3.4 ± 1.0                                      | 6.38                                    | p=0.001                             | q=0.068                                           |
| <i>Cyb5r2</i>                                             | 2.9 ± 0.8                                         | 0.8 ± 0.3                                      | 0.31                                    | p=0.025                             | q=0.384                                           |
| <i>Tnf</i>                                                | 2 ± 0.7                                           | 6 ± 1.2                                        | 3.17                                    | p=0.005                             | q=0.153                                           |
| <i>Cyp4a14</i>                                            | 0 ± 0                                             | 3.6 ± 2.5                                      | 26.24                                   | p=0.001                             | q=0.053                                           |
| <i>Bmpr1b</i>                                             | 0.8 ± 0.4                                         | 4.5 ± 0.9                                      | 5.02 *                                  | p=0.001                             | *q=0.046                                          |
| <i>Acsm5</i>                                              | 4.3 ± 1.1                                         | 9.8 ± 1.3                                      | 2.30                                    | p=0.003                             | q=0.108                                           |
| <i>Cyp4a12a</i>                                           | 0 ± 0.0                                           | 0.8 ± 0.5                                      | 6.64                                    | p=0.040                             | q=0.486                                           |
| <i>B3galt5</i>                                            | 12.1 ± 1.4                                        | 28.9 ± 5.1                                     | 2.54 *                                  | p<0.001                             | *q=0.008                                          |
| <i>Socs3</i>                                              | 177 ± 21.9                                        | 367.2 ± 39.8                                   | 2.23 *                                  | p<0.001                             | *q<0.001                                          |
| <i>Ehhadh</i>                                             | 28.8 ± 2.7                                        | 14.2 ± 2.6                                     | 0.50 *                                  | p<0.001                             | *q=0.007                                          |
| <i>Zpbp2</i>                                              | 3 ± 0.8                                           | 0 ± 0.0                                        | 0.04 *                                  | p<0.001                             | *q=0.003                                          |
| <i>Pdk4</i>                                               | 18.9 ± 3.5                                        | 8.5 ± 2.6                                      | 0.45                                    | p=0.013                             | q=0.270                                           |
| <i>Cyp4a10</i>                                            | 21.4 ± 5.4                                        | 3.1 ± 1.3                                      | 0.15 *                                  | p<0.001                             | *q=0.006                                          |
| <i>Cyp1a1</i>                                             | 0 ± 0.0                                           | 1.3 ± 0.8                                      | 12.16                                   | p=0.018                             | q=0.324                                           |

|                  |                |                |        |         |          |
|------------------|----------------|----------------|--------|---------|----------|
| <i>Saa1</i>      | 724.5 ± 119.1  | 2002.3 ± 399.2 | 2.87 * | p<0.001 | *q=0.001 |
| <i>Acot2</i>     | 485.7 ± 32.3   | 193.8 ± 24.7   | 0.40 * | p<0.001 | *q<0.001 |
| <i>G6pc</i>      | 353.2 ± 37.4   | 157.2 ± 20.2   | 0.45 * | p<0.001 | *q<0.001 |
| <i>Fam132b</i>   | 0.1 ± 0.1      | 2.7 ± 1.1      | 12.18  | p=0.003 | q=0.127  |
| <i>Cyp2c66</i>   | 1.1 ± 0.6      | 0 ± 0          | 0.11   | p=0.027 | q=0.397  |
| <i>Serpina12</i> | 0 ± 0          | 1.2 ± 0.6      | 11.98  | p=0.018 | q=0.326  |
| <i>Retsat</i>    | 632.6 ± 70.9   | 279.4 ± 33.2   | 0.45 * | p<0.001 | *q<0.001 |
| <i>Ces1b</i>     | 0.1 ± 0.1      | 1.9 ± 0.6      | 9.49   | p=0.002 | q=0.101  |
| <i>Acsm1</i>     | 1.5 ± 0.6      | 0.2 ± 0.1      | 0.22   | p=0.027 | q=0.399  |
| <i>Acsl6</i>     | 6.5 ± 0.8      | 3.1 ± 0.9      | 0.49   | p=0.024 | q=0.378  |
| <i>Pla2g4c</i>   | 28.2 ± 5.8     | 12.5 ± 2.5     | 0.48   | p=0.004 | q=0.144  |
| <i>Cers3</i>     | 1.4 ± 0.5      | 0.3 ± 0.2      | 0.28   | p=0.045 | q=0.515  |
| <i>Ugt2b1</i>    | 0.8 ± 0.4      | 3.2 ± 0.6      | 3.75   | p=0.006 | q=0.177  |
| <i>Hmgcs2</i>    | 1383.6 ± 121.8 | 323.20 ± 49.3  | 0.24 * | p<0.001 | *q<0.001 |
| <i>Cyp2d9</i>    | 4.8 ± 2.0      | 11.6 ± 3.2     | 2.60   | p=0.025 | q=0.386  |
| <i>Acot1</i>     | 127 ± 13.0     | 33.7 ± 5.2     | 0.27 * | p<0.001 | *q<0.001 |
| <i>Edn1</i>      | 45.4 ± 6.5     | 21 ± 5.5       | 0.45 * | p<0.001 | *q=0.013 |
| <i>Adora1</i>    | 15.8 ± 2.7     | 38.6 ± 6.5     | 2.47 * | p<0.001 | *q=0.006 |
| <i>Scd2</i>      | 175 ± 11.0     | 361.9 ± 60.4   | 2.06 * | p<0.001 | *q<0.001 |
| <i>Acot8</i>     | 1.3 ± 0.6      | 3.9 ± 0.9      | 2.86   | p=0.012 | q=0.259  |
| <i>Ugt1a1</i>    | 18.8 ± 2.7     | 4 ± 0.9        | 0.23 * | p<0.001 | *q<0.001 |
| <i>Cyp3a44</i>   | 8.8 ± 2.2      | 34.9 ± 5.2     | 4.05 * | p<0.001 | *q<0.001 |
| <i>Acat3</i>     | 1.8 ± 0.7      | 0.3 ± 0.2      | 0.21   | p=0.035 | q=0.455  |
| <i>Pigb</i>      | 2.7 ± 0.6      | 0.3 ± 0.2      | 0.16   | p=0.001 | q=0.055  |

Data presented as RNA-sequencing counts (average ± SEM).

Statistical significance was determined by t-test using the R statistical software package.

\* Represents significant effect relative to vehicle control (q<0.05); italicized q-values represent q<0.10.

<sup>a</sup> n=20 total; n=10 male vehicle, n=10 male PFAS.

**Table S6: Modulation of hepatic nuclear receptor signaling after exposure of *Ldlr*<sup>-/-</sup> mice to the PFAS mixture**

| Gene Name                                             | Female Vehicle<br>(Average Fold<br>Change ( $2^{-\Delta\Delta Ct}$ ) $\pm$<br>SEM) | Female PFAS<br>(Average Fold<br>Change ( $2^{-\Delta\Delta Ct}$ ) $\pm$<br>SEM) | Male Vehicle<br>(Average Fold<br>Change ( $2^{-\Delta\Delta Ct}$ ) $\pm$<br>SEM) | Male PFAS<br>(Average Fold<br>Change ( $2^{-\Delta\Delta Ct}$ ) $\pm$<br>SEM) | Overall PFAS<br>Exposure Fold<br>Change | Overall PFAS<br>Exposure<br>p-value <sup>b</sup> | Fold Change<br>PFAS Male vs.<br>PFAS Female | PFAS-Sex<br>Interaction p-<br>value <sup>c</sup> |
|-------------------------------------------------------|------------------------------------------------------------------------------------|---------------------------------------------------------------------------------|----------------------------------------------------------------------------------|-------------------------------------------------------------------------------|-----------------------------------------|--------------------------------------------------|---------------------------------------------|--------------------------------------------------|
| <b>Nuclear<br/>Receptor<br/>Signaling<sup>a</sup></b> |                                                                                    |                                                                                 |                                                                                  |                                                                               |                                         |                                                  |                                             |                                                  |
| <i>Nr1h4</i> (FXR)                                    | 1.14 $\pm$ 0.19                                                                    | 0.81 $\pm$ 0.18                                                                 | 1.37 $\pm$ 0.10                                                                  | 0.76 $\pm$ 0.07                                                               | 0.63 *                                  | *p=0.002                                         | 0.94                                        | p=0.35                                           |
| <i>mFgf15</i>                                         | 1.23 $\pm$ 0.27                                                                    | 0.46 $\pm$ 0.15                                                                 | 0.50 $\pm$ 0.08                                                                  | 1.46 $\pm$ 1.25                                                               | 1.08                                    | p=0.89                                           | 3.18                                        | p=0.20                                           |
| <i>Nr0b2</i> (SHP)                                    | 1.43 $\pm$ 0.41                                                                    | 0.28 $\pm$ 0.07                                                                 | 0.58 $\pm$ 0.14                                                                  | 0.29 $\pm$ 0.03                                                               | 0.28 #                                  | Sex<br>Interaction                               | 1.06                                        | #p=0.002                                         |
| <i>Nr1i2</i> (PXR)                                    | 1.04 $\pm$ 0.09                                                                    | 0.97 $\pm$ 0.07                                                                 | 0.73 $\pm$ 0.05                                                                  | 0.79 $\pm$ 0.08                                                               | 0.99                                    | p=0.952                                          | 0.81                                        | p=0.384                                          |
| <i>Cyp3a11</i>                                        | 1.40 $\pm$ 0.23                                                                    | 1.43 $\pm$ 0.38                                                                 | 0.80 $\pm$ 0.26                                                                  | 1.43 $\pm$ 0.61                                                               | 1.30                                    | p=0.412                                          | 1.00                                        | p=0.456                                          |
| <i>Nr1i3</i> (CAR)                                    | 1.11 $\pm$ 0.14                                                                    | 0.70 $\pm$ 0.10                                                                 | 0.50 $\pm$ 0.09                                                                  | 0.52 $\pm$ 0.09                                                               | 0.75 #                                  | Sex<br>Interaction                               | 0.74                                        | #p=0.047                                         |
| <i>Cyp2b10</i>                                        | 4.17 $\pm$ 2.42                                                                    | 10.41 $\pm$ 4.73                                                                | 9.47 $\pm$ 3.00                                                                  | 8.33 $\pm$ 1.66                                                               | 1.37                                    | p=0.425                                          | 0.80                                        | p=0.251                                          |
| <i>Nfe2l2</i> (NRF2)                                  | 1.16 $\pm$ 0.14                                                                    | 0.81 $\pm$ 0.09                                                                 | 0.61 $\pm$ 0.11                                                                  | 0.66 $\pm$ 0.06                                                               | 0.83                                    | p=0.156                                          | 0.82                                        | p=0.054                                          |
| <i>Keap1</i>                                          | 1.03 $\pm$ 0.08                                                                    | 0.87 $\pm$ 0.03                                                                 | 0.74 $\pm$ 0.07                                                                  | 0.83 $\pm$ 0.14                                                               | 0.96                                    | p=0.717                                          | 0.95                                        | p=0.277                                          |
| <i>Gstm1</i>                                          | 1.02 $\pm$ 0.07                                                                    | 2.11 $\pm$ 0.18                                                                 | 0.92 $\pm$ 0.16                                                                  | 1.21 $\pm$ 0.05                                                               | 1.71 #                                  | Sex<br>Interaction                               | 0.57                                        | #p=0.004                                         |
| <i>Ppara</i>                                          | 1.02 $\pm$ 0.06                                                                    | 0.82 $\pm$ 0.07                                                                 | 0.77 $\pm$ 0.08                                                                  | 1.24 $\pm$ 0.58                                                               | 1.16                                    | p=0.637                                          | 1.51                                        | p=0.264                                          |
| <i>Ppar<math>\delta/\beta</math></i>                  | 1.03 $\pm$ 0.08                                                                    | 0.85 $\pm$ 0.06                                                                 | 0.60 $\pm$ 0.05                                                                  | 0.54 $\pm$ 0.10                                                               | 0.86                                    | p=0.079                                          | 0.64                                        | p=0.971                                          |

Statistical significance for the interaction and main effects of PFAS exposure and sex between all treatment groups (male vehicle, male PFAS, female vehicle, female PFAS) was determined using Two-Way ANOVA.

\* Represents significant overall PFAS exposure fold change (p<0.05).

# Represents significant PFAS-Sex Interaction (p<0.05).

<sup>a</sup> n=40 total; n=10 male vehicle, n=10 male PFAS, n=10 female vehicle, n=10 female PFAS.

<sup>b</sup> Overall PFAS exposure p-value; Sex Interaction indicates that there was a significant interaction between PFAS exposure and sex.

<sup>c</sup> PFAS-Sex Interaction p-values determined by Two-Way ANOVA using SigmaPlot. With past consultation from biostatisticians, a significant interaction term supersedes the main effects and can make their meaning unclear. We therefore have not included the main effects p-values for any result with a significant interaction.
